# Supplementary material for: Development of a PTFE membrane with photo-thermal activated carbon nanomaterials for improved solar-driven membrane distillation
Source: Royal Society of Chemistry journal article supplement (doi:10.1039/d5ra06460k), 2025-01-01
Supplement: d5ra06460k1.pdf [file d5ra06460k1.pdf]

## Development of a PTFE Membrane with Photo-Thermal Activated Carbon Nanomaterials for Improved Solar-Driven Membrane Distillation

Wesam Abd El-Fattah<sup>1</sup>, Ahlem Guesmi<sup>1</sup>, Naoufel Ben Hamadi<sup>1</sup>, Bassant Ebraheem<sup>2</sup>, An Ding<sup>3</sup>,  
Mohamed E.A. Ali<sup>2,\*</sup>

<sup>1</sup>Chemistry Department, College of Science, Imam Mohammad Ibn Saud Islamic University (IMSIU), P.O. Box 5701, Riyadh 11432, Saudi Arabia.

<sup>2</sup>Egypt Desalination Research Center of Excellence (EDRC) & Hydrogeochemistry Dept., Desert Research Center, Cairo, 11753, Egypt.

<sup>3</sup>School of Environment and Energy Engineering, Beijing University of Civil Engineering and Architecture, Beijing 100044, China

**Table (1): Represent Salts from a saline synthetic Solution.**

| Salt                                 | Weight(gm) |
|--------------------------------------|------------|
| NaCl                                 | 24         |
| Na <sub>2</sub> So <sub>4</sub>      | 4          |
| NaHSO <sub>4</sub>                   | 0.172      |
| MgCl <sub>2</sub> .6H <sub>2</sub> O | 7.1        |
| KCl                                  | 0.7        |
| CaCl <sub>2</sub>                    | 1.14       |

**Table (2): percentages of the constituent elements of AC**

Weight %

|                      | C    | N    | O    | Al   | Si   | Cl  | Ca  | Fe  |
|----------------------|------|------|------|------|------|-----|-----|-----|
| ACTIVATED CARBON_pt1 | 28.9 | 2.8  | 40.6 | 11.6 | 13.9 | 0.2 | 0.4 | 1.7 |
| ACTIVATED CARBON_pt2 | 36.4 | 7.3  | 39.6 | 4.0  | 12.2 |     |     | 0.5 |
| ACTIVATED CARBON_pt3 | 43.3 | 15.8 | 32.3 | 2.8  | 4.3  |     |     | 1.6 |

Atom %

|                      | C    | N    | O    | Al  | Si  | Cl  | Ca  | Fe  |
|----------------------|------|------|------|-----|-----|-----|-----|-----|
| ACTIVATED CARBON_pt1 | 39.3 | 3.2  | 41.6 | 7.0 | 8.1 | 0.1 | 0.2 | 0.5 |
| ACTIVATED CARBON_pt2 | 45.8 | 7.9  | 37.4 | 2.2 | 6.5 |     |     | 0.1 |
| ACTIVATED CARBON_pt3 | 51.3 | 16.0 | 28.7 | 1.5 | 2.2 |     |     | 0.4 |

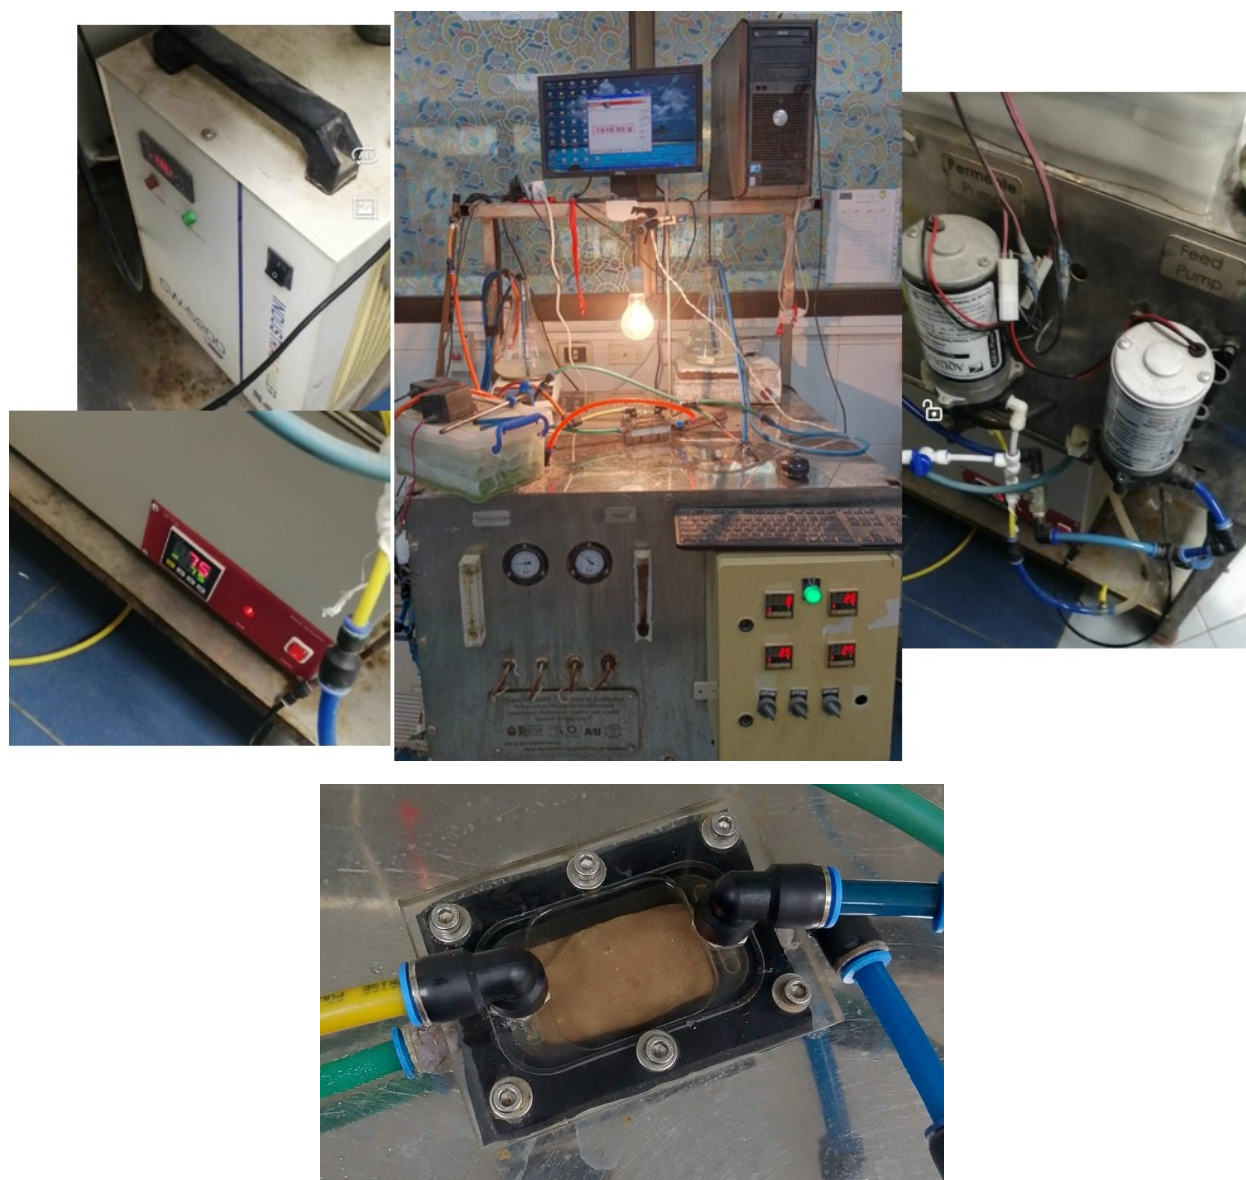

Fig.S1 Real form of the device ,and the used Cell with quartz window.
